# Supplementary material for: Ternary Electrical Memory Devices Based on Polycarbazole: SnO2 Nanoparticles Composite Material
Source: MDPI journal article supplement (doi:10.3390/polym14071494), 2022-04-06
Supplement: s1 [file s1]

# Supplementary Materials: Ternary electrical memory devices based on polycarbazole:SnO<sub>2</sub> nanoparticles composite material

Yingna Zhang <sup>1</sup>, Feng Dou <sup>1</sup>, Yijia Zhou <sup>1</sup>, Xiaofeng Zhao <sup>2</sup>, Jiangshan Chen <sup>3</sup>, Cheng Wang <sup>1,4,\*</sup> and Shuhong Wang <sup>1,\*</sup>

<sup>1</sup> School of Chemical Engineering and Materials, Heilongjiang University, Harbin 150080, P. R. China;

<sup>2</sup> School of Electronic Engineering, Heilongjiang University, Harbin 150080, P. R. China;

<sup>3</sup> Institute of Polymer Optoelectronic Materials and Devices, State Key Laboratory of Luminescent Materials and Devices, Guangdong Provincial Key Laboratory of Luminescence from Molecular Aggregates, South China University of Technology, Guangzhou 510640, P.R. China;

<sup>4</sup> Key Laboratory of Functional Inorganic Material Chemistry, Ministry of Education, Heilongjiang University, Harbin 150080, P. R. China; wangc\_93@163.com (C.W.)

\* Correspondence: wangshuhong@hlju.edu.cn (S.W.); wangc\_93@163.com (C.W.)

## 1. Instrumentation and characterization

By using Bruker advance 400 NMR spectrometry detector and CDCl<sub>3</sub> as solvent, <sup>1</sup>H NMR and <sup>13</sup>C NMR spectra were identified at a resonance frequency of 400 MHz. Fourier transform infrared spectroscopy (FT-IR) was used to identify the polymeric material by Magna-IR560 infrared spectrometer. The spectral range was 4000–450 wavenumbers, and the resolution was 2 cm<sup>-1</sup>. Thermogravimetric analysis (TGA) was determined via a 10-mg solid powdered specimen under N<sub>2</sub> at a temperature increase rate of 10°C/min (PerkinElmer Pyris 6 TGA). The UV-vis absorptive spectrum was measured with a Shimadzu UV-3600 spectral photometer under ambient temperature. The cyclic voltammetry (CV) measuring was completed via a CHI 660E electrochemistry work station with 0.1 M Bu<sub>4</sub>NClO<sub>4</sub>/CH<sub>3</sub>CN liquor as the electrolytic solution at 50 mV/s. The X-ray diffraction (XRD) measurement is performed with a polycrystalline X-ray diffractometer. The SEM image was captured via the S-4700 SEM under atmospheric conditions, Keithley 4200-SCS was utilized to identify the current-voltage (I-V) features of the storage device.

## 2. <sup>1</sup>H NMR and <sup>13</sup>C NMR spectra of monomer

<sup>1</sup>H NMR (400 MHz, CDCl<sub>3</sub>): δ(ppm) 8.45(s, 1H), 8.39(s, 1H), 8.00(t, J = 8.5Hz, 2H), 7.73–7.61(m, 2H), 7.37(s, 2H). <sup>13</sup>C NMR (101 MHz, CDCl<sub>3</sub>): δ(ppm) 158.73 (C18), 150.60 (C6), 143.15 (C5), 135.15 (C7), 132.69 (C15), 132.39 (C10), 132.19 (C17), 132.13 (C8), 132.01 (C14), 129.85 (C16), 128.34 (C12), 127.42 (C3), 127.16 (C2), 127.12 (C11), 123.82 (C13), 120.30 (C9), 113.36 (C4), 106.47 (C1).

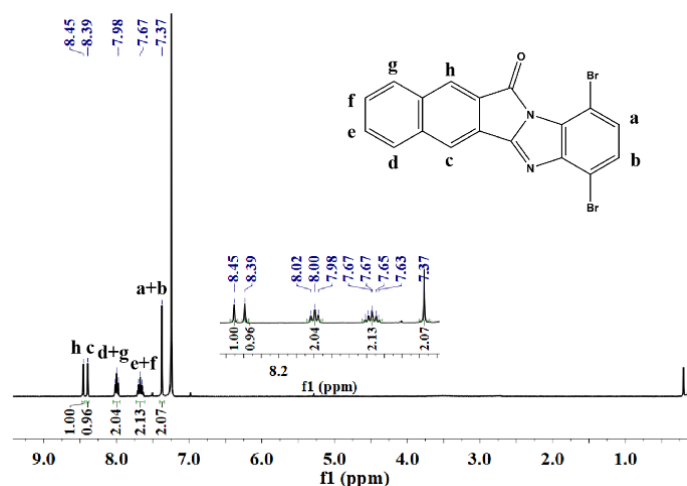

Figure S1.  $^1\text{H}$  NMR spectrum of monomer.

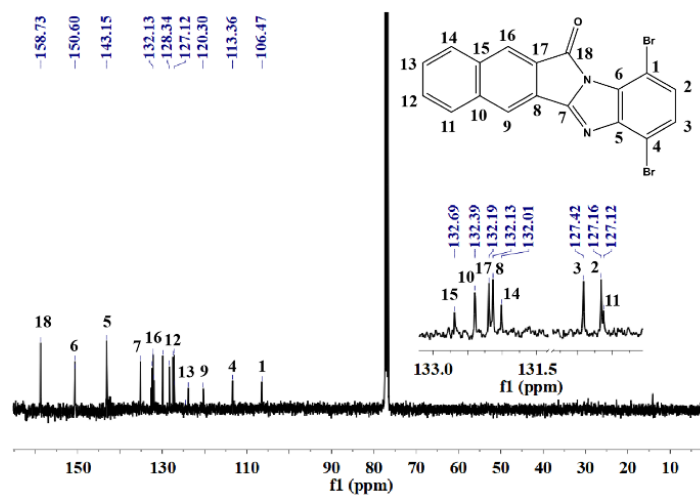

Figure S2.  $^{13}\text{C}$  NMR spectrum of monomer.

### 3. $^1\text{H}$ NMR spectra of PIB

$^1\text{H}$  NMR (400 MHz,  $\text{CDCl}_3$ ):  $\delta$ (ppm) 9.28–7.49 (m, 15H), 4.68 (dd,  $J = 122.2, 48.6$  Hz, 1H), 1.96 (dd,  $J = 106.5, 48.8$  Hz, 4H), 1.33–0.89 (m, 24H), 0.77 (s, 6H).

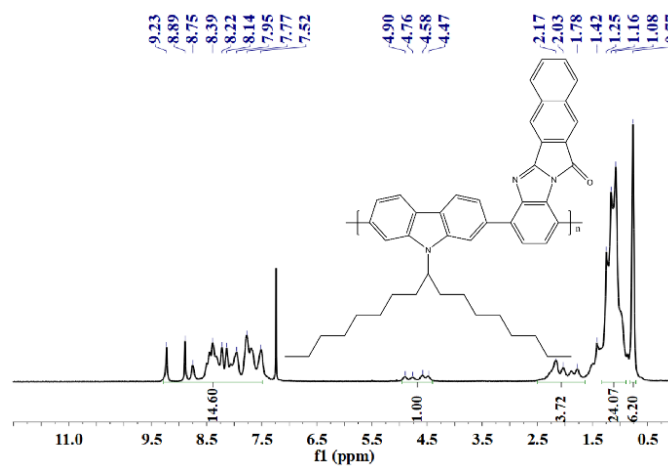

Figure S3.  $^1\text{H}$  NMR spectrum of PIB.

#### 4. Molecular weight and thermal stability of polymer

The value of the mean molecule weight ( $\overline{M}_n$ ) was 24,450, the weight of the mean molecule weight ( $\overline{M}_w$ ) was 31,545, and its distributional index of the molecule weight was 1.29. The 10 mg specimen was progressively heated to 800°C at a temperature rise speed of 10°C/min in N<sub>2</sub>. The outcomes show that the polymeric material displayed satisfactory thermostability. When the weight loss is 10%, the thermal decomposition temperature  $T_d$  is higher than 460°C.

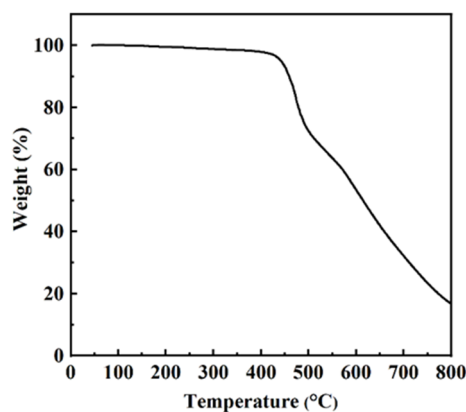

Figure S4. TGA curves of PIB.

#### 5. Optical and electrochemical properties

Table S1. Optical and electrochemical properties of polymers.

|     | $T_{d,10\%}(^{\circ}\text{C})^a$ | $\lambda_{\text{onset}}(\text{nm})^b$ | $E_{\text{onset}}(\text{V})^c$ | $E_g^{\text{opt}}(\text{eV})^d$ | $E_{\text{HOMO}}(\text{eV})^e$ | $E_{\text{LUMO}}(\text{eV})^e$ |
|-----|----------------------------------|---------------------------------------|--------------------------------|---------------------------------|--------------------------------|--------------------------------|
| PIB | 460                              | 488                                   | 0.55                           | 2.54                            | −4.97                          | −2.43                          |

a  $T_{d,10\%}$ : Decomposition temperature at 10% thermal weight loss under N<sub>2</sub>.

b  $\lambda_{\text{onset}}$ : Starting wavelength of polymer solution.

c  $E_{\text{onset}}$ : The onset potential of the CV curve.

d  $E_g^{\text{opt}} = 1240/\lambda_{\text{onset}}$ .

e  $E_{\text{HOMO}} = -(E_{\text{onset}} \text{ vs. Ag/AgCl} - E_{\text{ferrocene}} + 4.8) \text{ eV}$ ;  $E_{\text{LUMO}} = E_{\text{HOMO}} + E_g^{\text{opt}}$
